# Supplementary material
Source: MDPI journal article supplement (https://www.mdpi.com/2073-4344/11/1/140)
Supplement: s1 [file s1]

# Catalysis

## An Alternative Enzymatic Route to the Ergogenic Ketone Body Ester (*R*)-3-Hydroxybutyl (*R*)-3-Hydroxybutyrate

Ferdinando Zaccone 1, Valentina Venturi 1, Pier Paolo Giovannini 1,\*  
Claudio Trapella1,..

### Supplementary Materials

#### Contents

|                                                                                                 |           |
|-------------------------------------------------------------------------------------------------|-----------|
| <sup>1</sup> H- and <sup>13</sup> C-NMR spectra of compound <b>4</b>                            | <b>S1</b> |
| <sup>1</sup> H- and <sup>13</sup> C-NMR spectra of compound <b>5</b>                            | <b>S2</b> |
| <sup>1</sup> H- and <sup>13</sup> C-NMR spectra of compound <b>6</b>                            | <b>S3</b> |
| <sup>1</sup> H- and <sup>13</sup> C-NMR spectra of compound <b>9</b>                            | <b>S4</b> |
| Chiral phase GC of ( <i>R,R</i> )- <b>4</b> and ( <i>R,R</i> )/( <i>R,S</i> )- <b>4</b> mixture | <b>S5</b> |
| Chiral phase GC of acetylated ( <i>R</i> )- <b>2</b> from ( <i>S</i> )- <b>2</b> inversion      | <b>S6</b> |
| Chiral phase GC of acetylated ( <i>R</i> )- <b>3</b> from kinetic resolution rac- <b>3</b>      | <b>S7</b> |
| Chiral phase GC of ( <i>R</i> )- <b>6</b> from inversion of ( <i>S</i> )- <b>5</b>              | <b>S8</b> |

# $^1\text{H}$ - and $^{13}\text{C}$ -NMR spectra of compound **4**

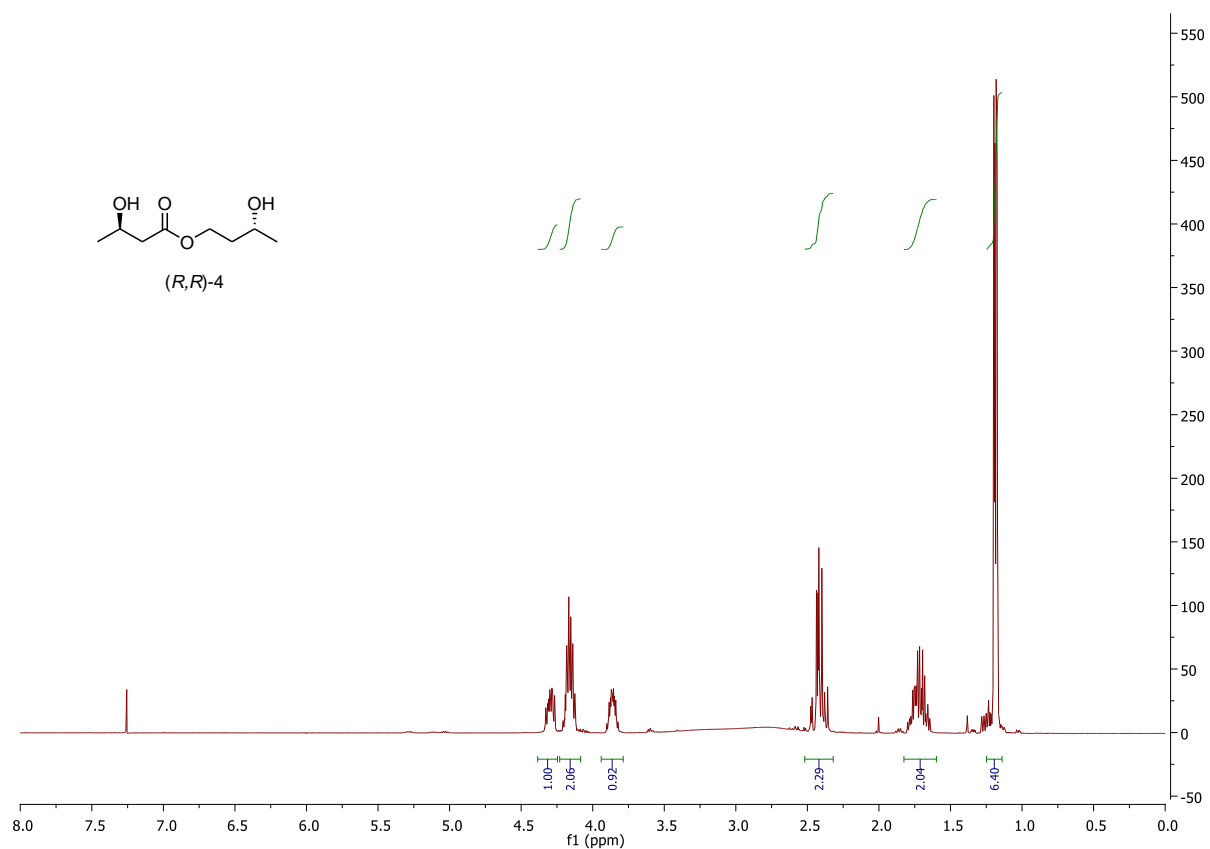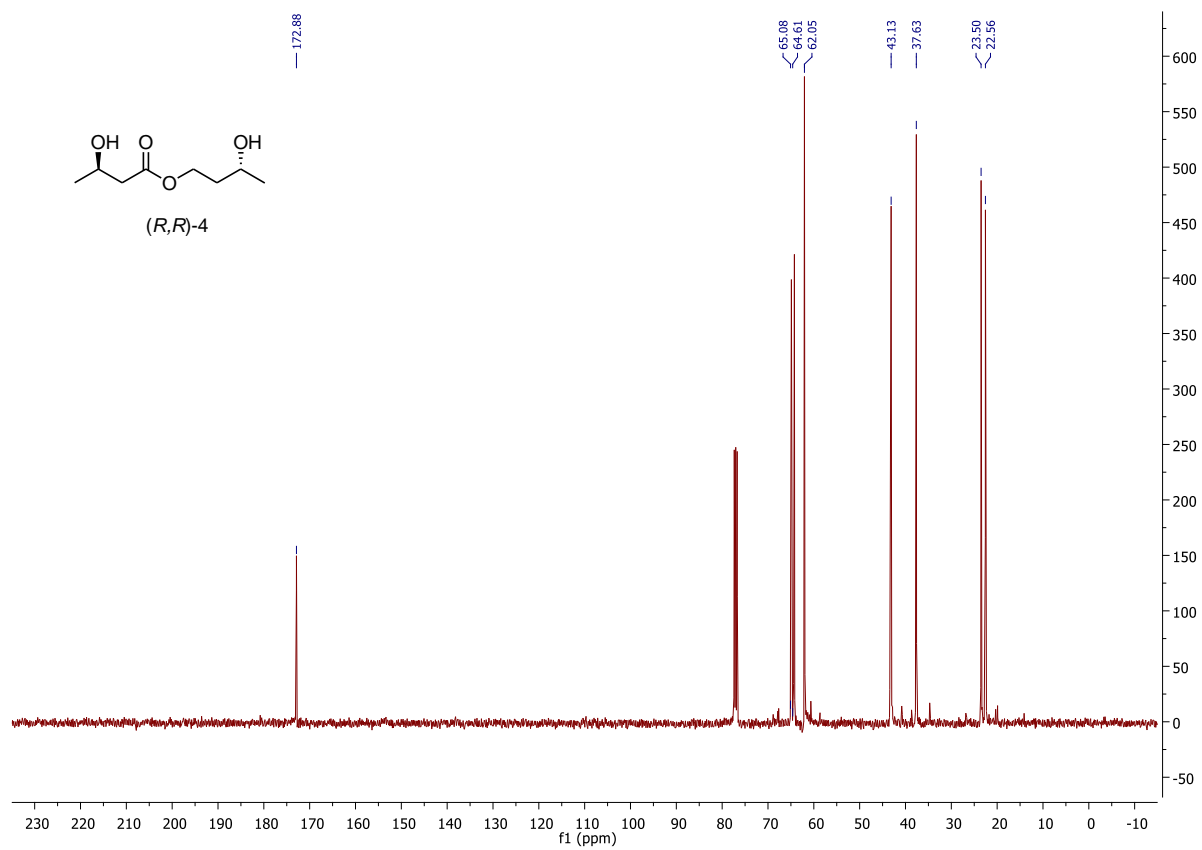

# $^1\text{H}$ - and $^{13}\text{C}$ -NMR spectra of compound 5

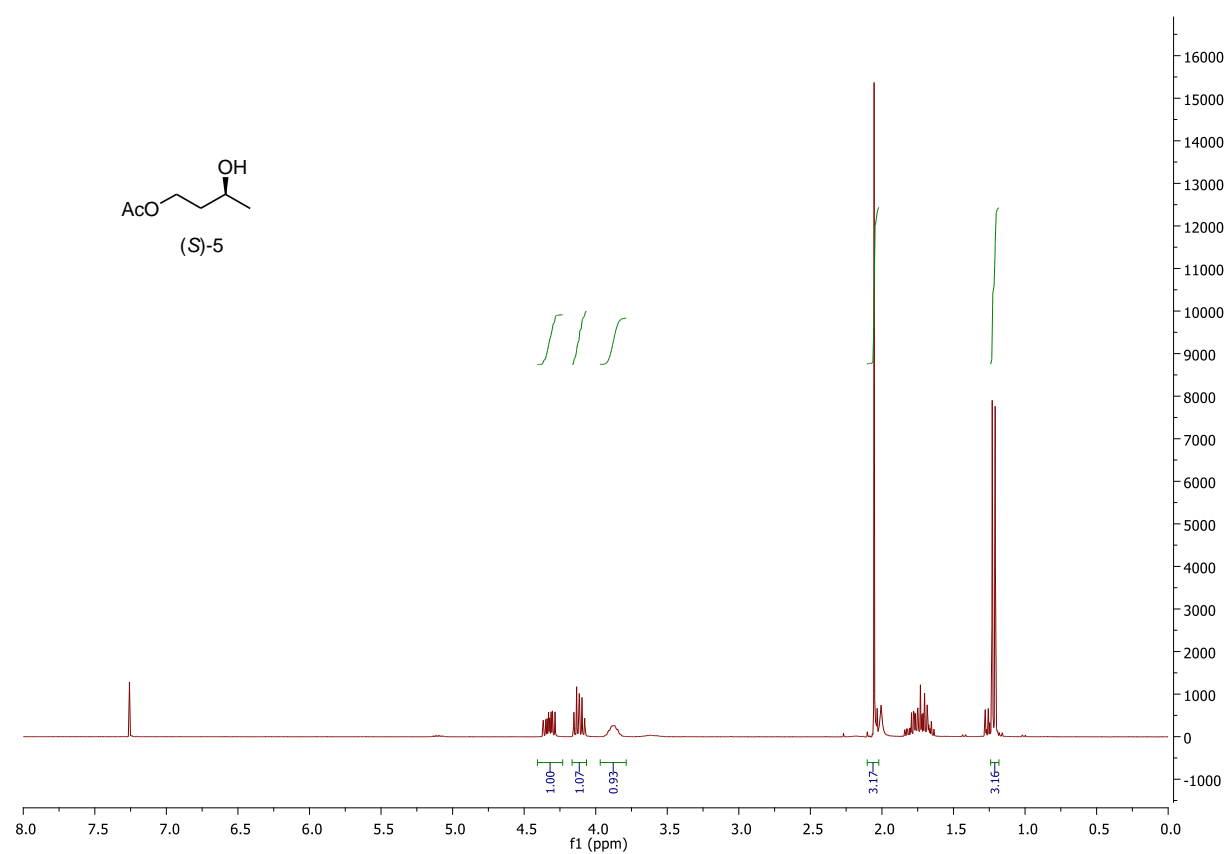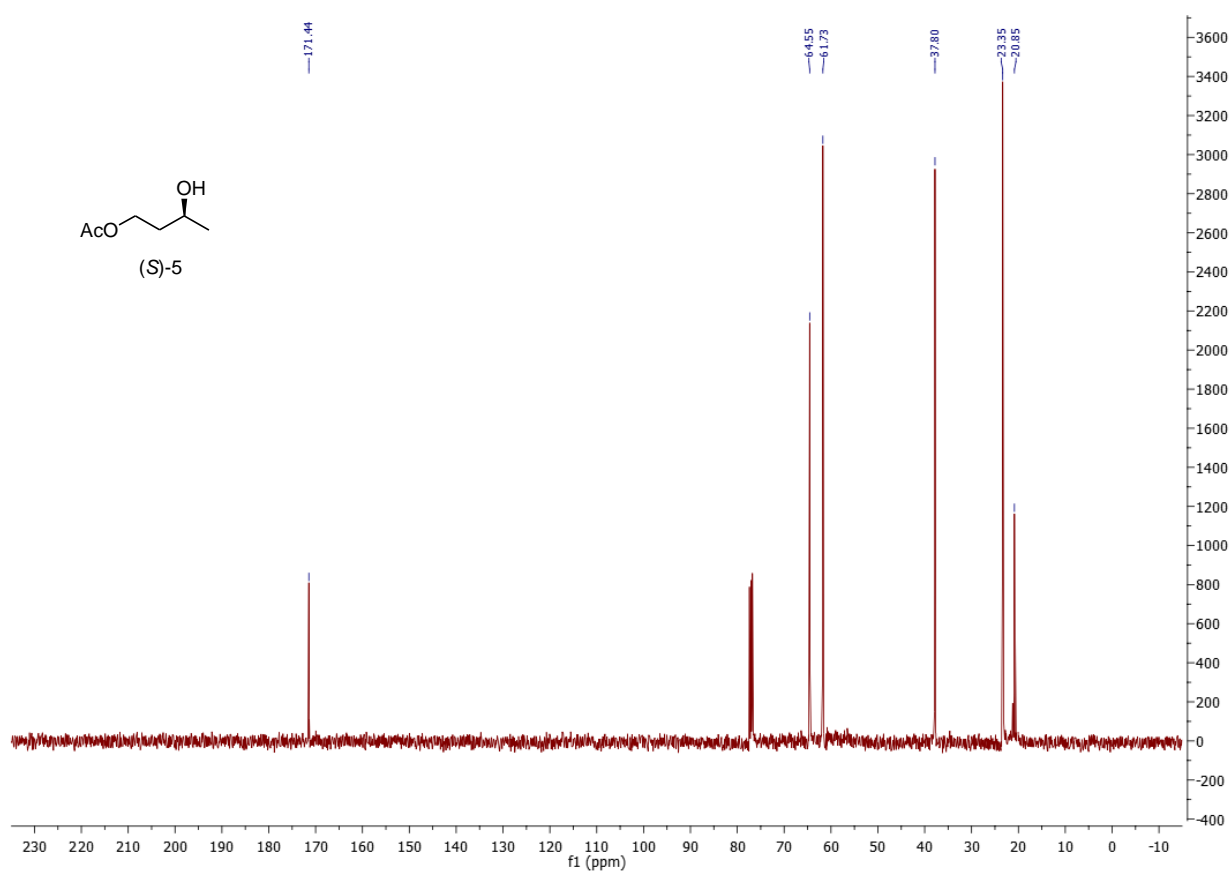

# <sup>1</sup>H- and <sup>13</sup>C-NMR spectra of compound 6

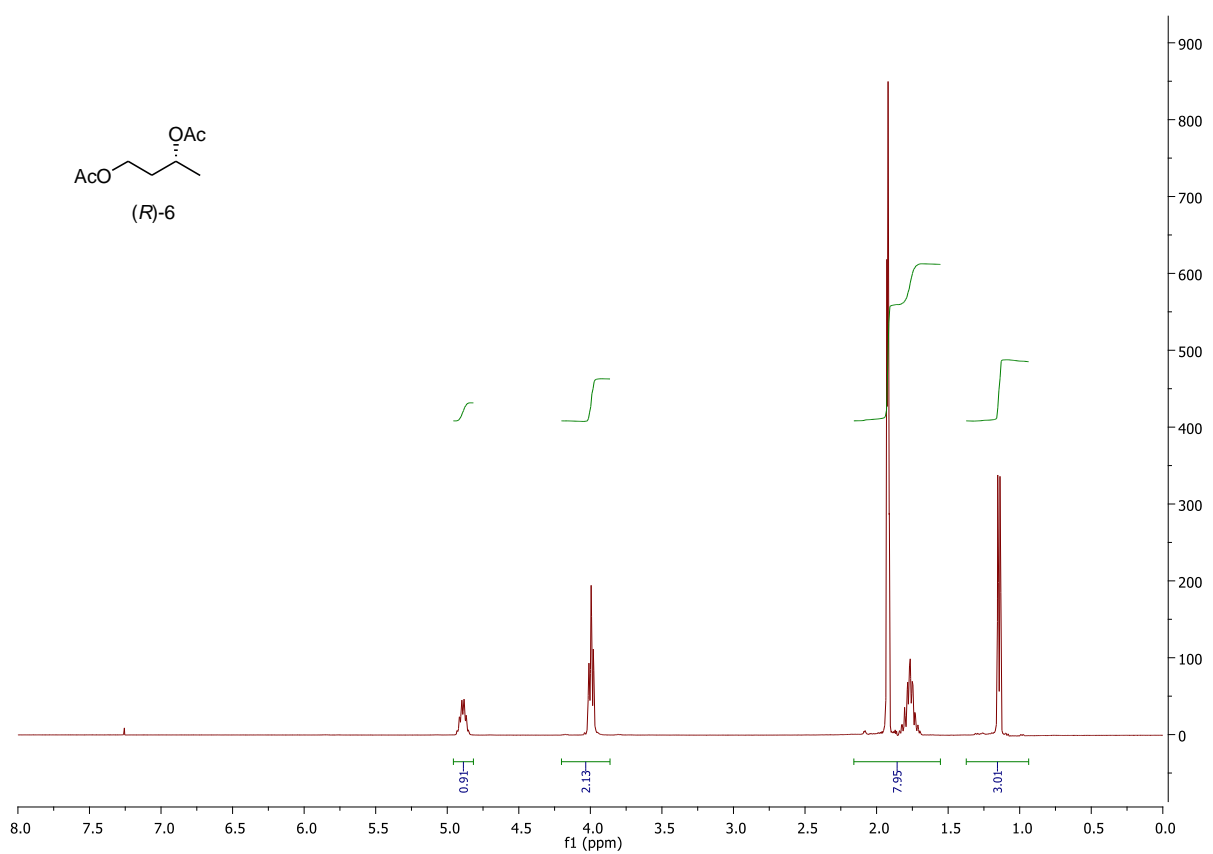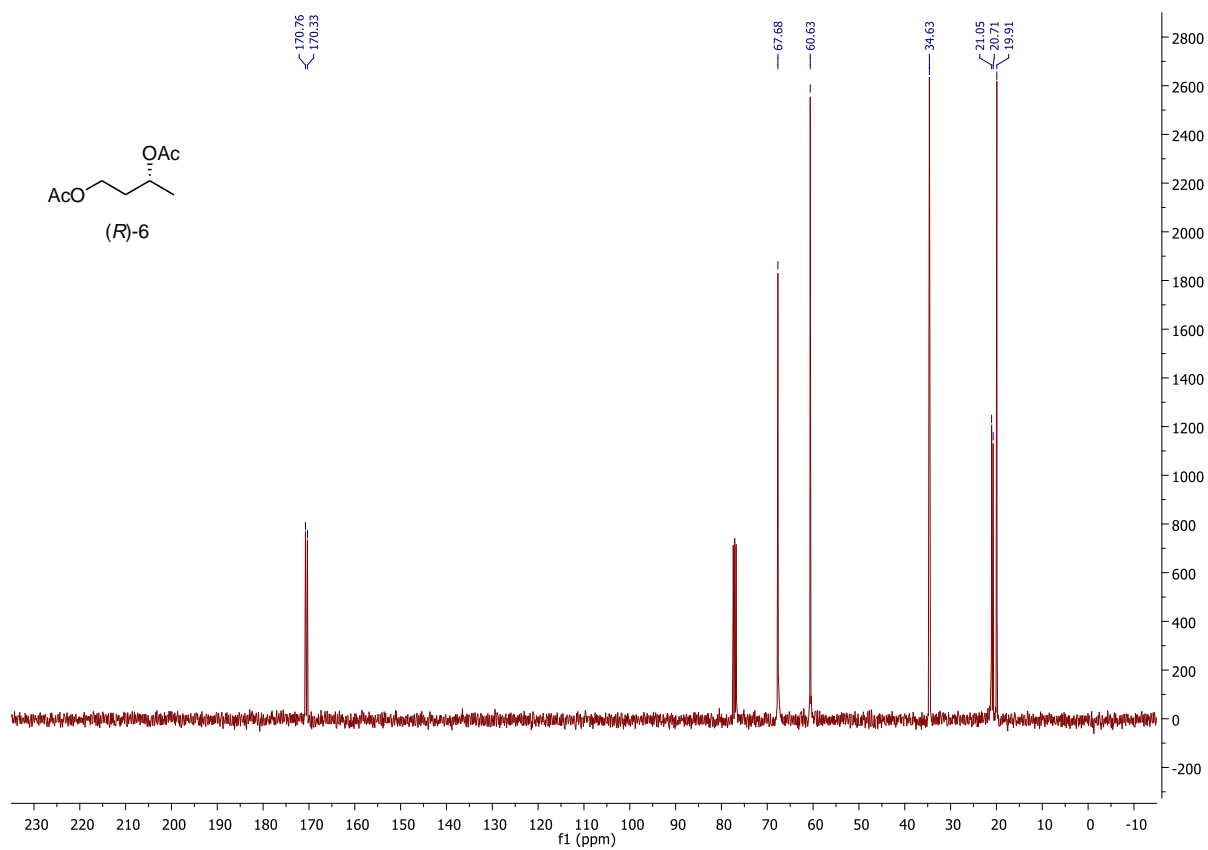

# <sup>1</sup>H- and <sup>13</sup>C-NMR spectra of compound **9**

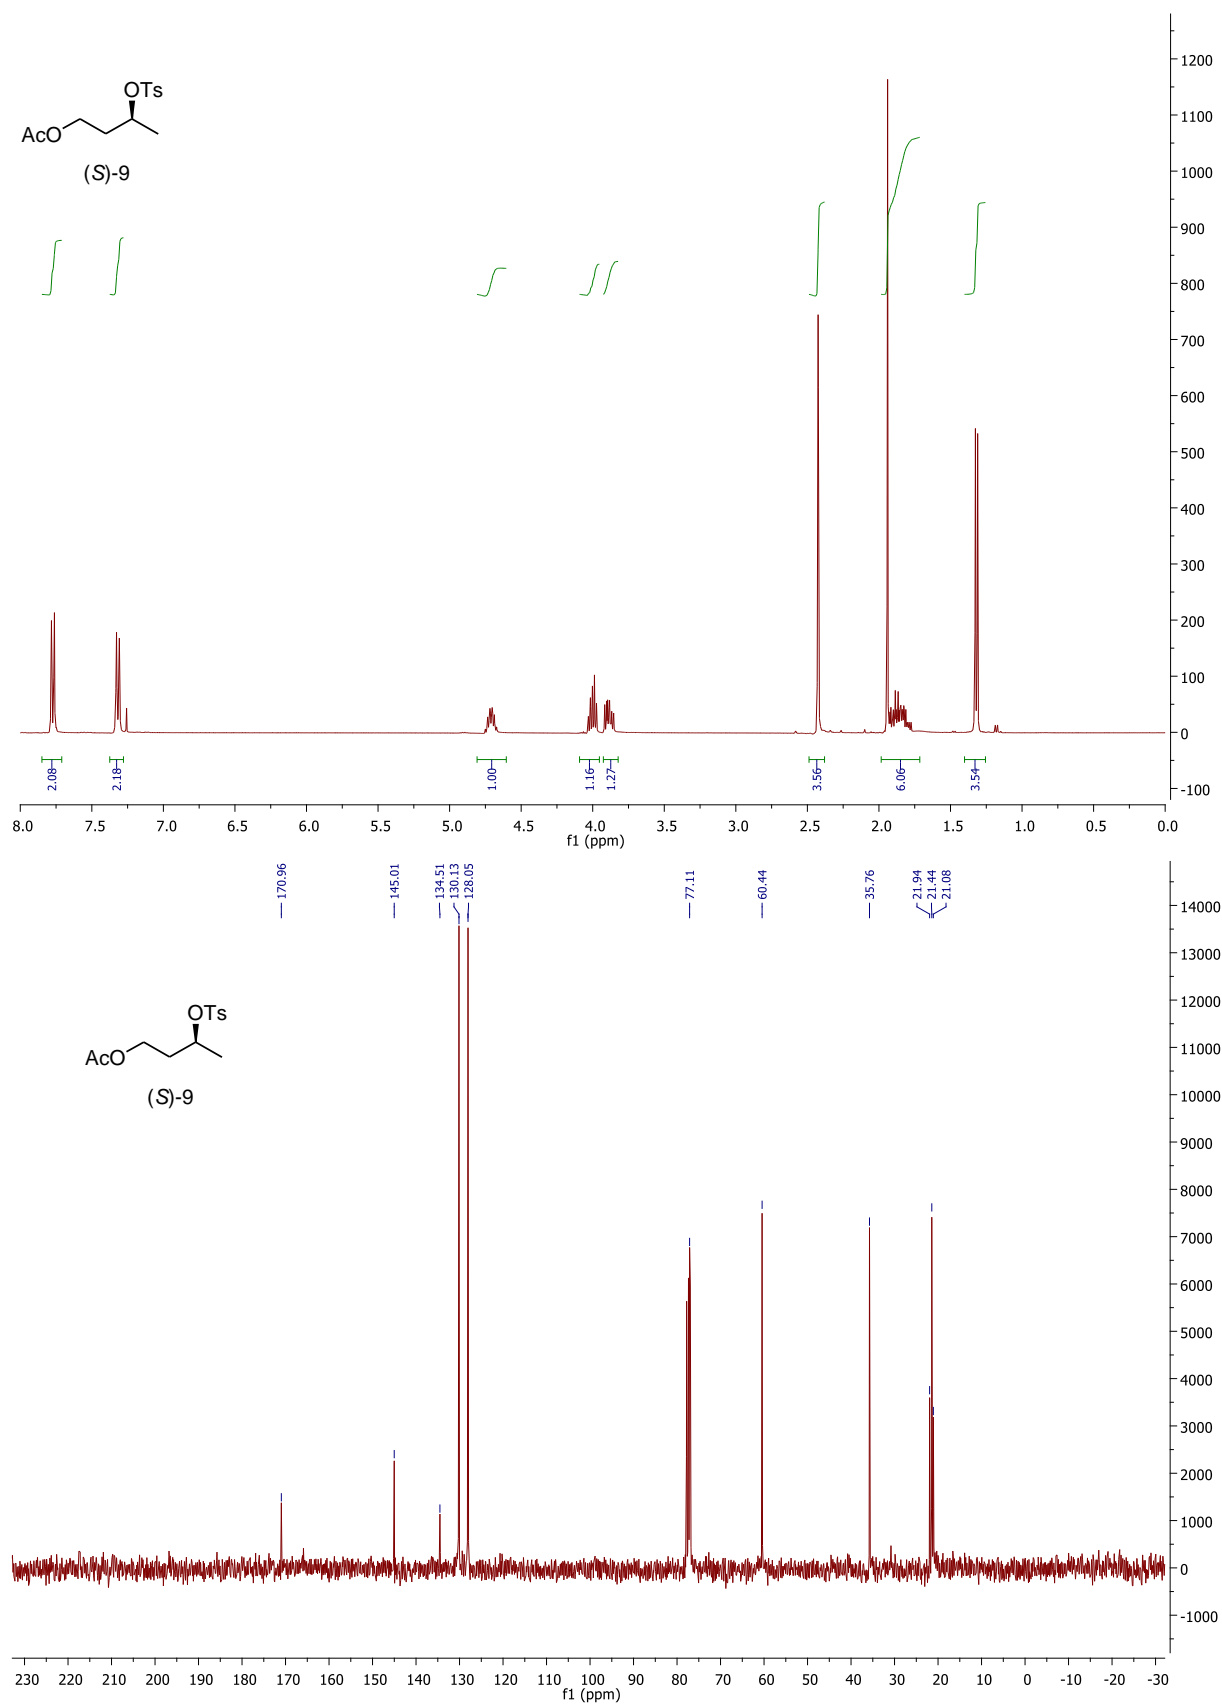

# Chiral phase GC of (R,R)-**4** and (R,R)/(R,S)-**4** mixture

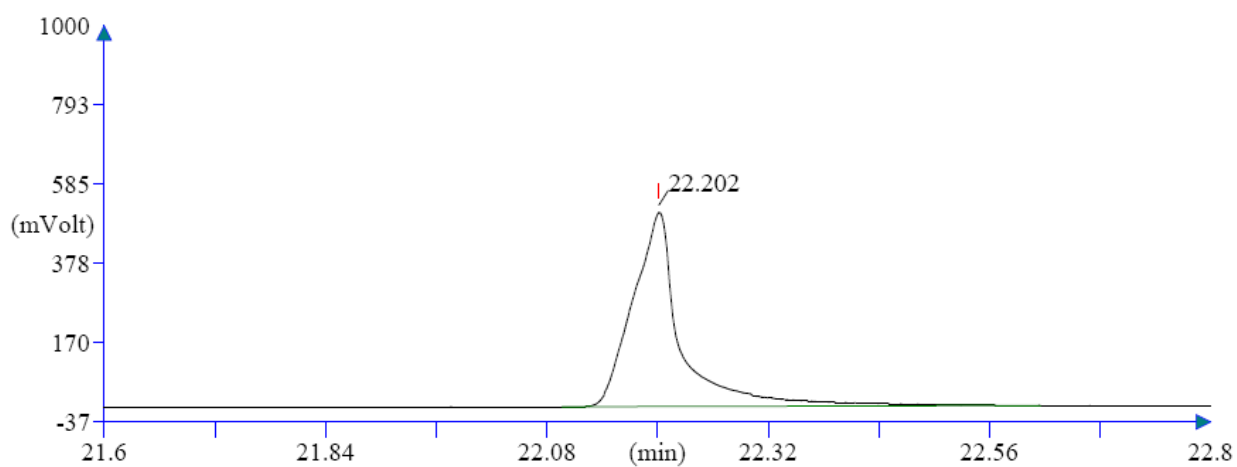

| Retention Time<br>(min) | Area<br>(.1*uV*sec) | Area %<br>(%) | Original Conc | Co |
|-------------------------|---------------------|---------------|---------------|----|
| 22.202                  | 18626870            | 100.000       | 100.000       |    |
|                         | 18626870            |               | 100.000       |    |

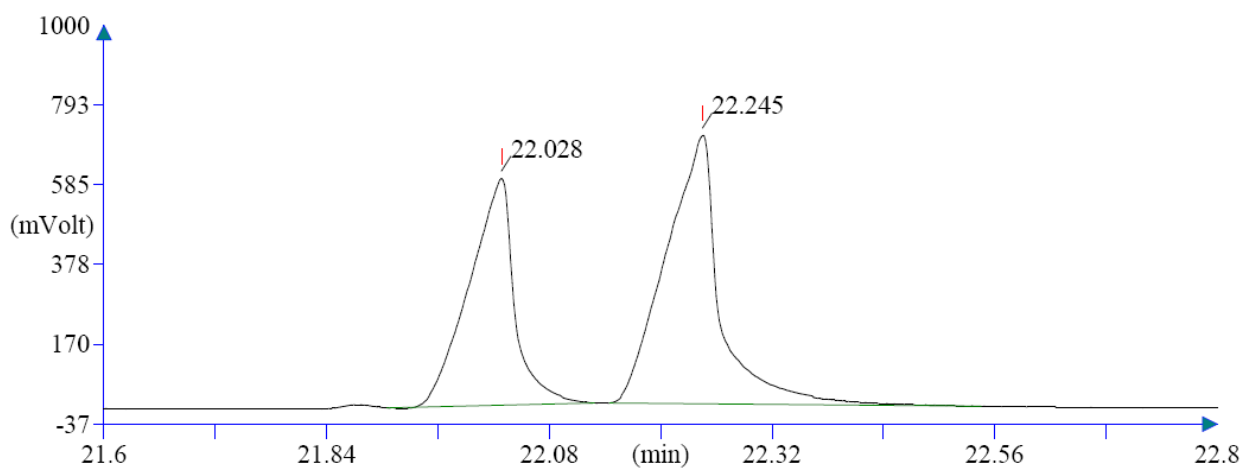

| Retention Time<br>(min) | Area<br>(.1*uV*sec) | Area %<br>(%) | Original Conc | Co |
|-------------------------|---------------------|---------------|---------------|----|
| 22.028                  | 20120600            | 41.202        | 41.202        |    |
| 22.245                  | 28713300            | 58.798        | 58.798        |    |
|                         | 48833900            |               | 100.000       |    |

Chiral phase GC of acetylated (*R*)-2 from (*S*)-2 inversion

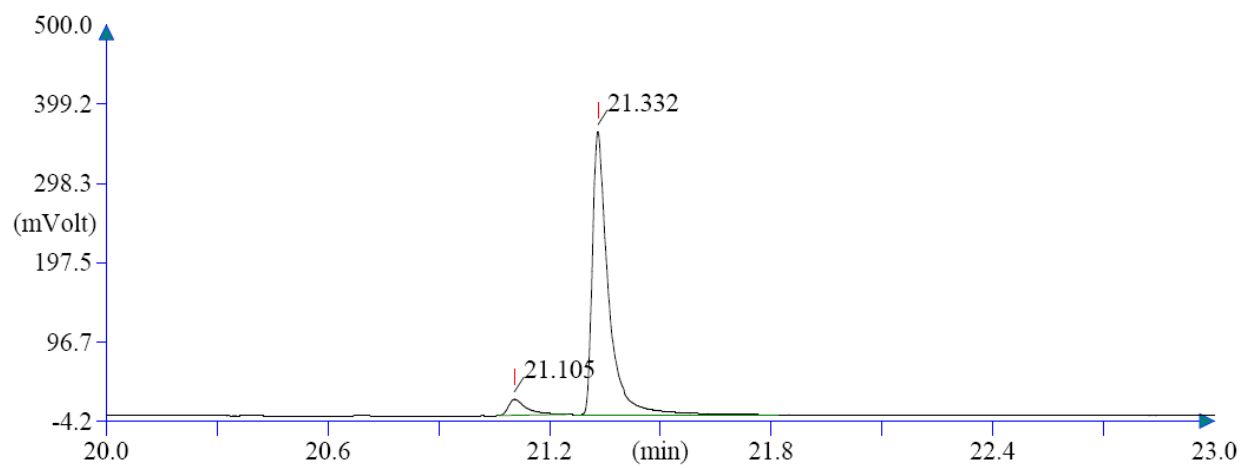

| Retention Time<br>(min) | Area<br>(.1*uV*sec) | Area %<br>(%) | Original Conc | Con |
|-------------------------|---------------------|---------------|---------------|-----|
| 21.105                  | 708121              | 6.096         | 6.096         |     |
| 21.332                  | 10908030            | 93.904        | 93.904        |     |
|                         | 11616150            |               | 100.000       |     |

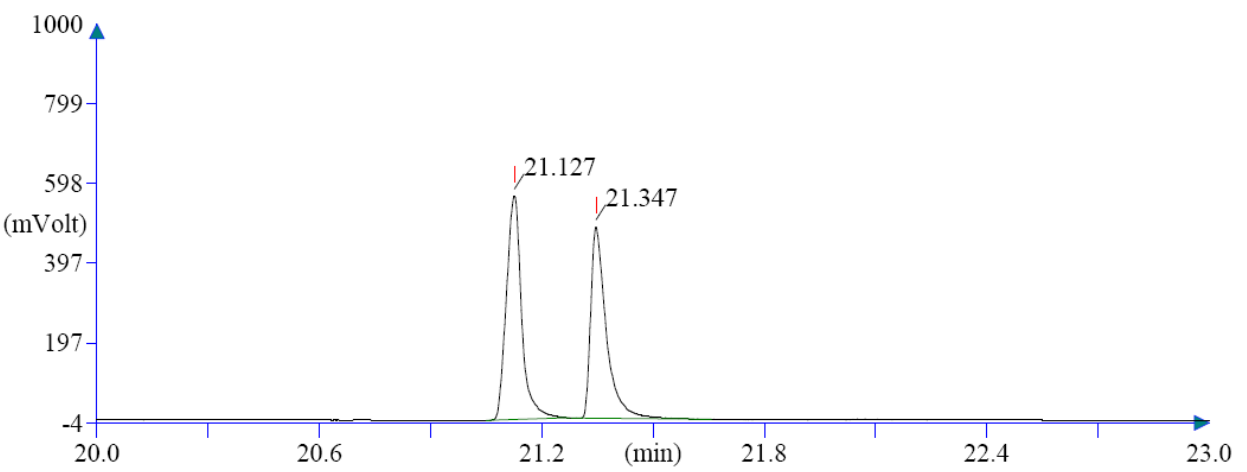

| Retention Time<br>(min) | Area<br>(.1*uV*sec) | Area %<br>(%) | Original Conc | Con |
|-------------------------|---------------------|---------------|---------------|-----|
| 21.127                  | 16122260            | 53.444        | 53.444        |     |
| 21.347                  | 14044540            | 46.556        | 46.556        |     |
|                         | 30166800            |               | 100.000       |     |

Chiral phase GC of acetylated (*R*)-3 from kinetic resolution rac-3

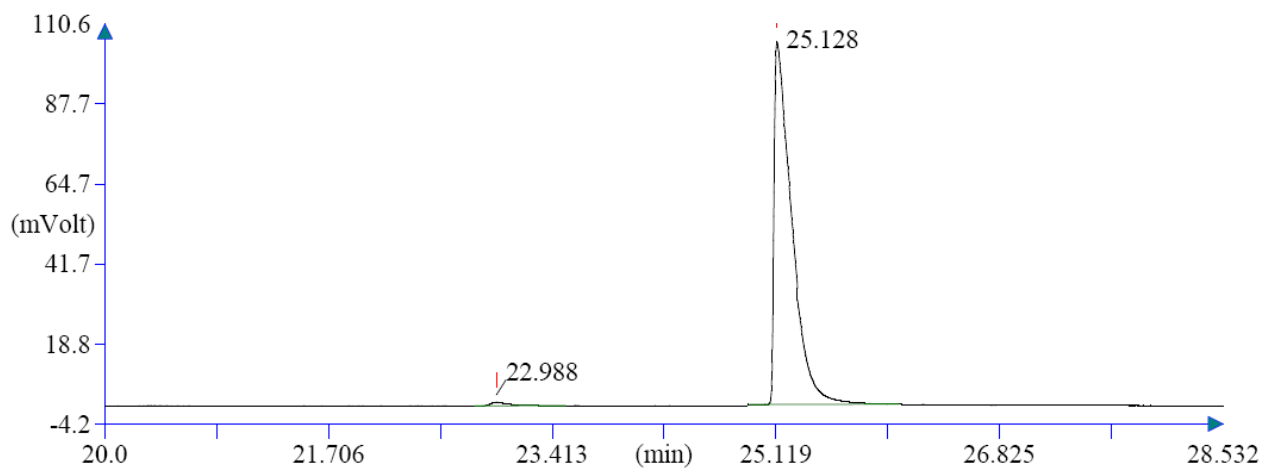

| Retention Time<br>(min) | Area<br>(.1*uV*sec) | Area %<br>(%) | Original Conc | Cor |
|-------------------------|---------------------|---------------|---------------|-----|
| 22.988                  | 108327              | 1.103         | 1.103         |     |
| 25.128                  | 9713536             | 98.897        | 98.897        |     |
|                         | 9821863             |               | 100.000       |     |

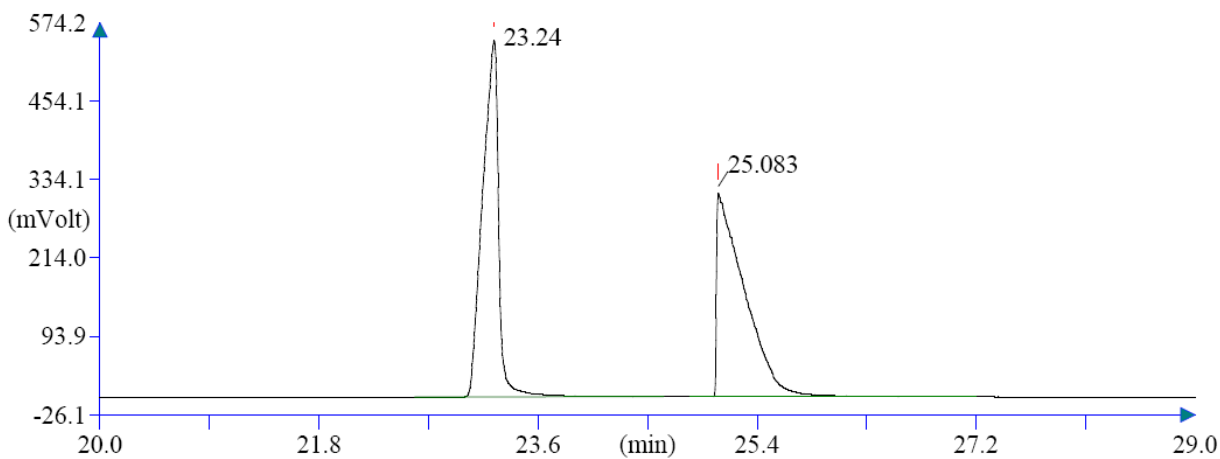

| Retention Time<br>(min) | Area<br>(.1*uV*sec) | Area %<br>(%) | Original Conc | Con |
|-------------------------|---------------------|---------------|---------------|-----|
| 23.240                  | 50110000            | 50.339        | 50.339        |     |
| 25.083                  | 49436020            | 49.661        | 49.661        |     |
|                         | 99546020            |               | 100.000       |     |



Chiral phase GC of (R)-6 from inversion of (S)-5

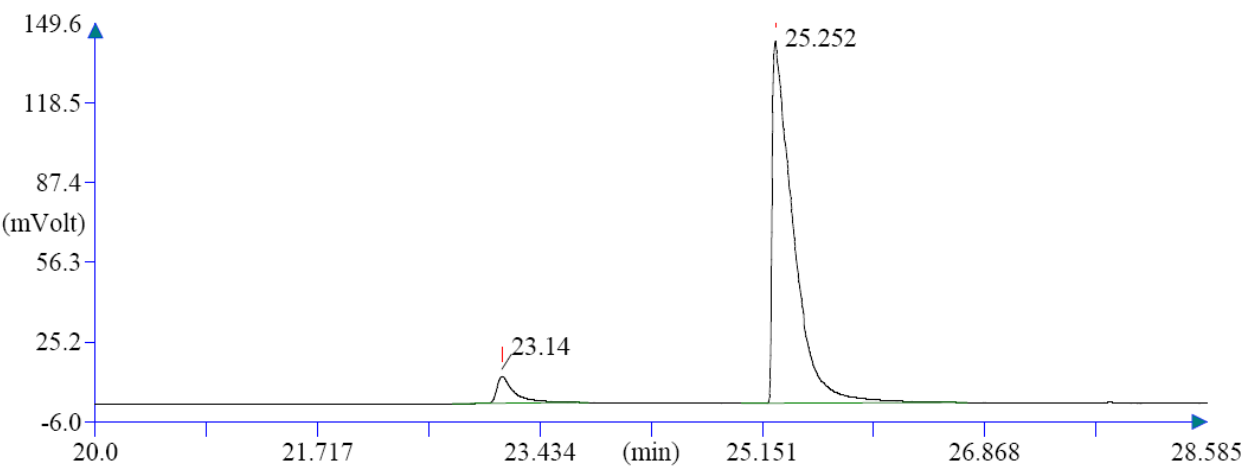

| Retention Time<br>(min) | Area<br>(.1*uV*sec) | Area %<br>(%) | Original Conc | Con |
|-------------------------|---------------------|---------------|---------------|-----|
| 23.140                  | 1013249             | 5.989         | 5.989         |     |
| 25.252                  | 15906180            | 94.011        | 94.011        |     |
|                         | 16919430            |               | 100.000       |     |

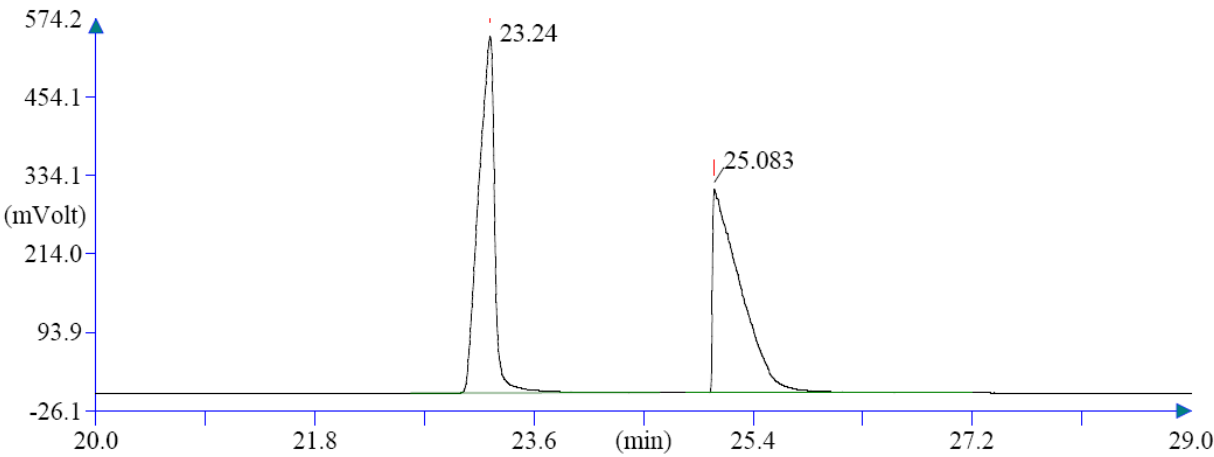

| Retention Time<br>(min) | Area<br>(.1*uV*sec) | Area %<br>(%) | Original Conc | Con |
|-------------------------|---------------------|---------------|---------------|-----|
| 23.240                  | 50110000            | 50.339        | 50.339        |     |
| 25.083                  | 49436020            | 49.661        | 49.661        |     |
|                         | 99546020            |               | 100.000       |     |
